# Supplementary material for: A Semiquantitative Framework for Gene Regulatory Networks: Increasing the Time and Quantitative Resolution of Boolean Networks
Source: PLOS journal article supplement (doi:10.1371/journal.pone.0130033), 2015-06-11

**S1 Fig. Histogram of the first 5000 values (other than zero) of T-bet obtained by repeated random sampling.** No values lower than 0,03 are detected. There is a clear trend for lower values to be less likely.

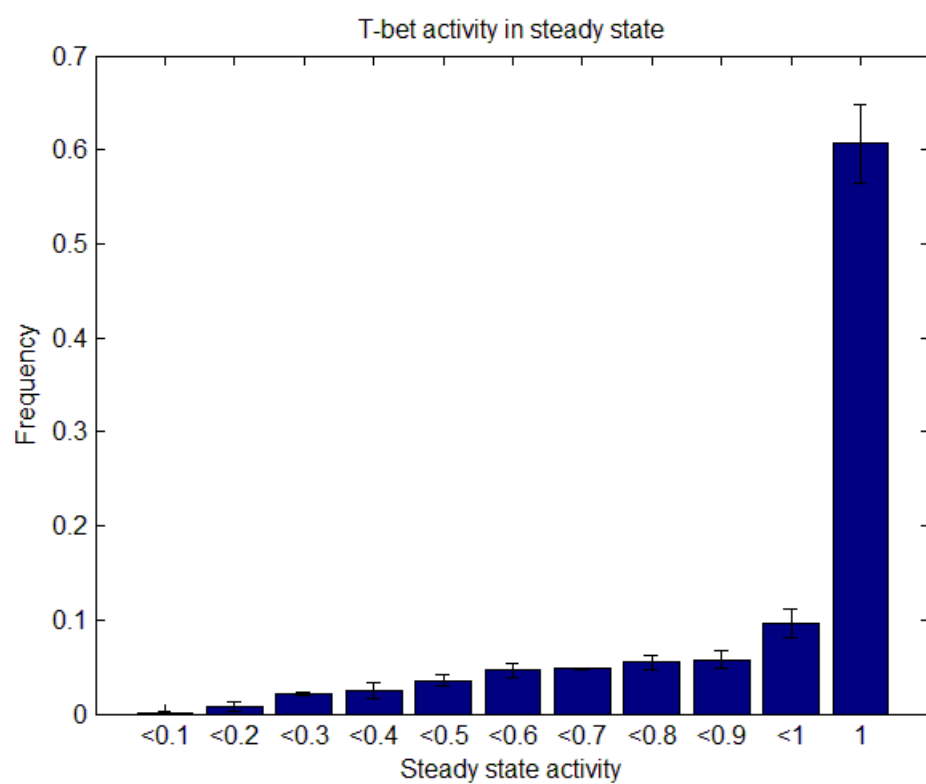

Supplement: S2 (10.1371/journal.pone.0130033.s002) [file journal.pone.0130033.s002]
